# Supplementary material for: Onco-miR-130 promotes cell proliferation and migration by targeting TGFβR2 in gastric cancer
Source: PubMed Central journal article supplement (PMC5190115; doi:10.18632/oncotarget.9936), 2016-06-10
Supplement: oncotarget-07-44522-s001.pdf [file oncotarget-07-44522-s001.pdf]

## Onco-miR-130 promotes cell proliferation and migration by targeting TGFβR2 in gastric cancer

### SUPPLEMENTARY FIGURES

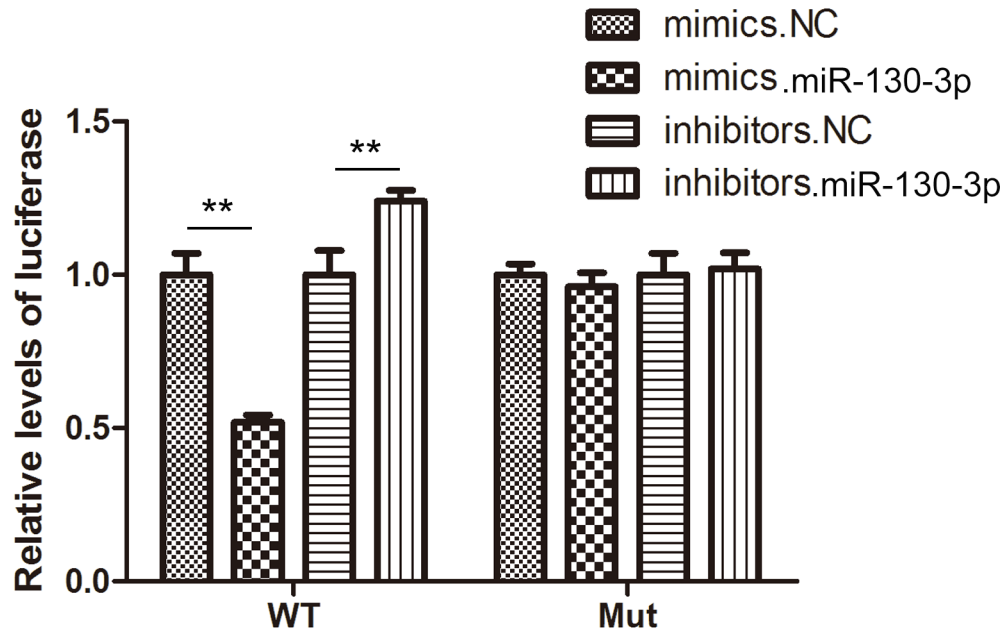

**Supplementary Figure S1: The luciferase reporter gene analysis in HEK293T cells.** The results show that miR-130 can directly bind to the 3'UTR of TGFβR2. \*\* indicates  $P < 0.01$ .

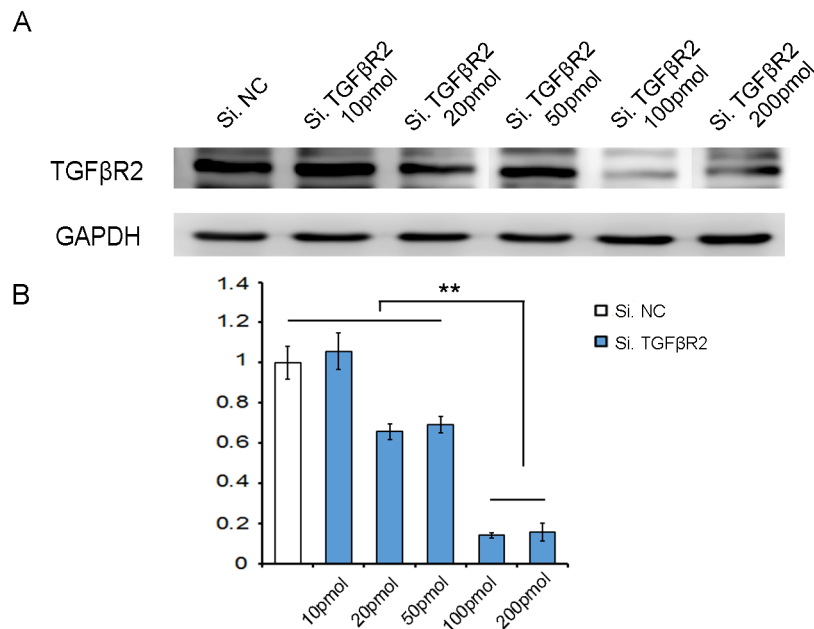

**Supplementary Figure S2: The western blotting in siRNA-TGFβR2 treated cells from low concentration to high concentration.** It is proved that the concentration of 100 pmol is appropriate. **A.** The western blotting analysis. **B.** Quantitative analyses of A. \*\* indicates  $P < 0.01$ .
